# Supplementary material
Source: publisher site journal article supplement (https://www.dovepress.com/article/559273)
Supplement: Supplementary file 1 [file Supplementary%20material.docx]

Table S1: The differences in the maternal-fetal outcomes between pregnant women with CTDs and healthy pregnant women

| Variable | All pregnant women  (n=452) | Pregnant women with CTDs  （n=226） | Pregnant women in control group  (n=226) | ***x2 /t*** | P |
| --- | --- | --- | --- | --- | --- |
| Age | 30.78±3.46 | 31.10±3.46 | 30.46±3.44 | -1.949 | 0.052 |
| Assisted reproductive, yes | 102 | 79（35.0%） | 23（10.2%） | 39.705 | <0.001** |
| Preterm birth, yes | 30 | 24(10.6%) | 6(2.7%) | 11.568 | 0.001* |
| Days of gestation | 272.42±10.77 | 268.08±11.47 | 276.77±7.94 | 9.376 | <0.001** |
| Cesarean section, yes | 253 | 139（61.5%） | 114（50.4%） | 5.611 | 0.018* |
| Postpartum blood loss at 2 hours | 257.69±146.43 | 271.81±171.31 | 243.58±115.02 | -2.056 | 0.040* |
| Postpartum blood loss at 24 hours | 377.90±218.97 | 402.11±271.44 | 353.69±145.80 | -2.362 | 0.019* |
| Apgar scores at 1 minute | 9.88±0.61 | 9.83±0.70 | 9.93±0.51 | 1.691 | 0.092 |
| Apgar scores at 5 minutes | 9.98±0.18 | 9.98±0.20 | 9.99±0.15 | 0.536 | 0.592 |
| Neonatal birth weight | 3244.00±506.72 | 3113.54±552.67 | 3374.47±418.38 | 5.659 | <0.001** |
| Neonatal birth gender |  |  |  | 0.726 | 0.394 |
| Male | 251 | 121（53.5%） | 130（57.5%） |  |  |
| Female | 201 | 105（46.5%） | 96（42.5%） |  |  |
| Transferred to paediatrics | 27 | 22（9.7%） | 5（2.2%） | 11.384 | 0.001* |
| HADS-anxiety | 4.31±2.71 | 4.64±2.92 | 3.97±2.44 | -2.654 | 0.008* |
| HADS-depression | 3.25±2.92 | 3.45±2.94 | 3.05±2.89 | -1.452 | 0.147 |

Notes: CTDs, connective tissue diseases

BMI, body mass index

Hospital Anxiety and Depression Scale，HADS

*, *P* < 0.05

**, *P*<0.001
